# Supplementary material
Source: Elsevier journal article supplement (https://www.sciencedirect.com/science/article/pii/S0213911119302237)
Supplement: mmc1 [file S0213911119302237:mmc1.docx]

**Apéndice**

**Figura 1.** Consumo frecuente de alcohol (independientemente de la bebida consumida) por sexo y edad.

**Figura 2.** Consumo frecuente de cerveza por sexo y edad.

**Figura 3.** Consumo frecuente de vino por sexo y edad.

**Figura 4.** Consumo frecuente de licores destilados por sexo y edad.

**Figura 5.** Haber experimentado cuatro o más episodios de embriaguez en la vida por sexo y edad.
